# Supplementary material
Source: MDPI journal article supplement (https://www.mdpi.com/2072-4292/8/7/524)

# Watching Grass Grow

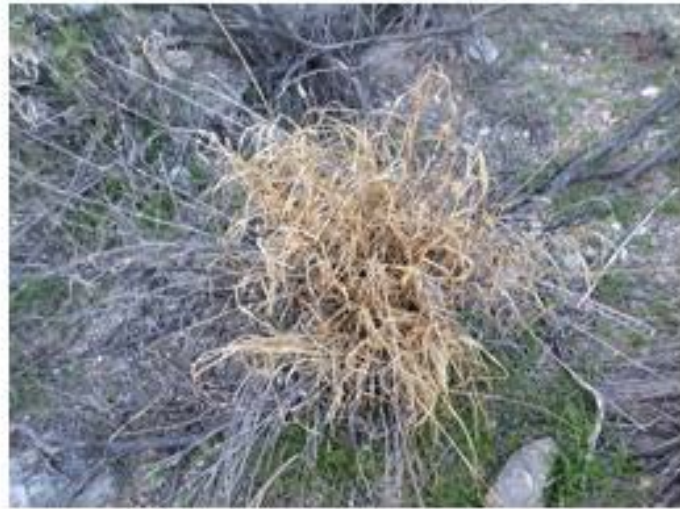

1-16-2014

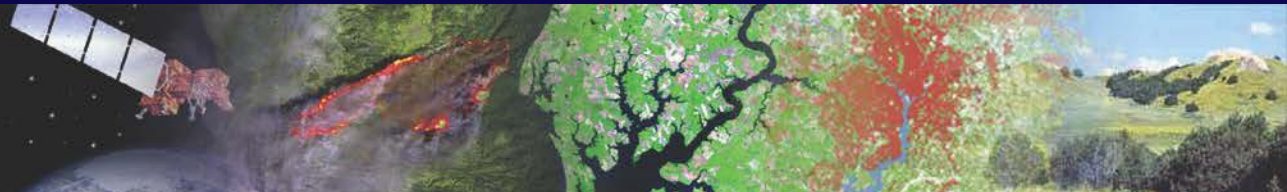

# Watching Grass Grow

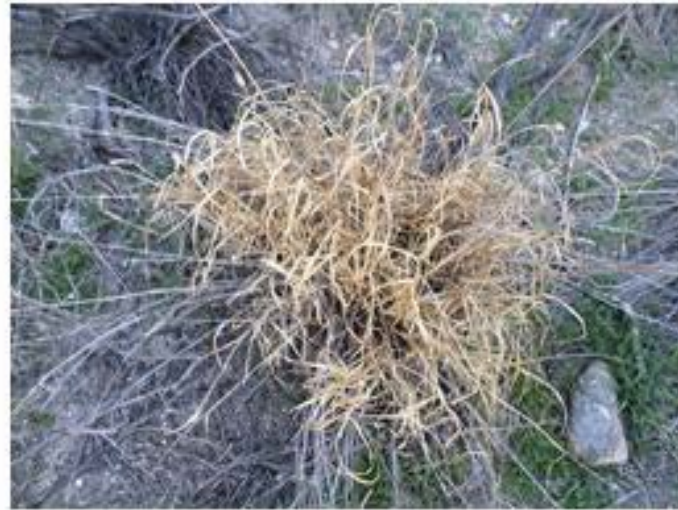

1-26-2014



# Watching Grass Grow

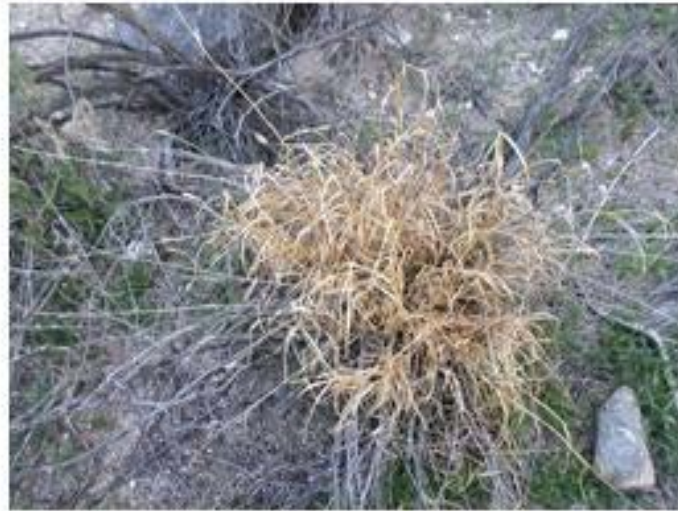

2-06-2014



# Watching Grass Grow

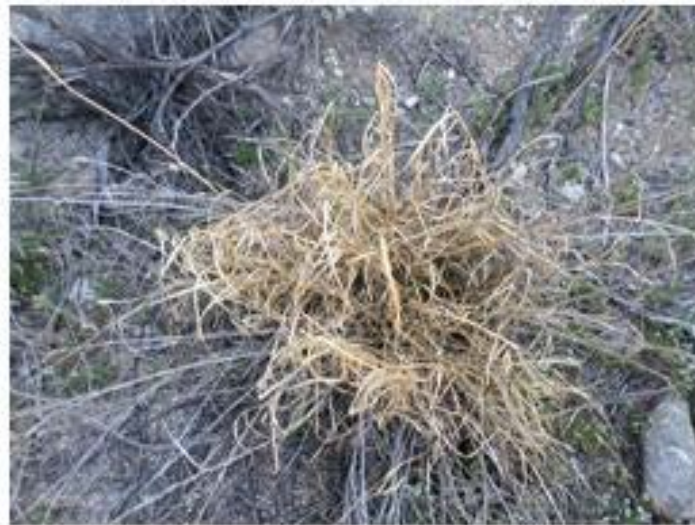

3-15-2014



# Watching Grass Grow

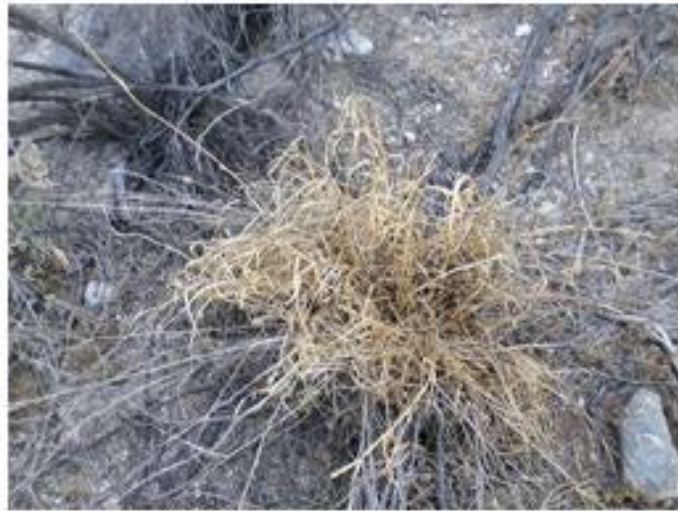

4-24-2014



# Watching Grass Grow

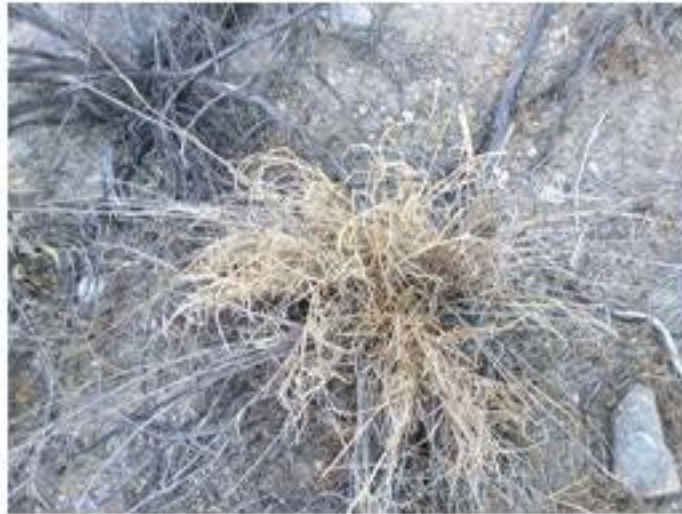

6-26-2014

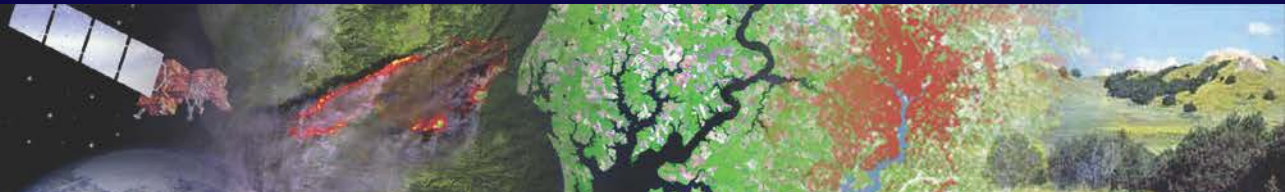

# Watching Grass Grow

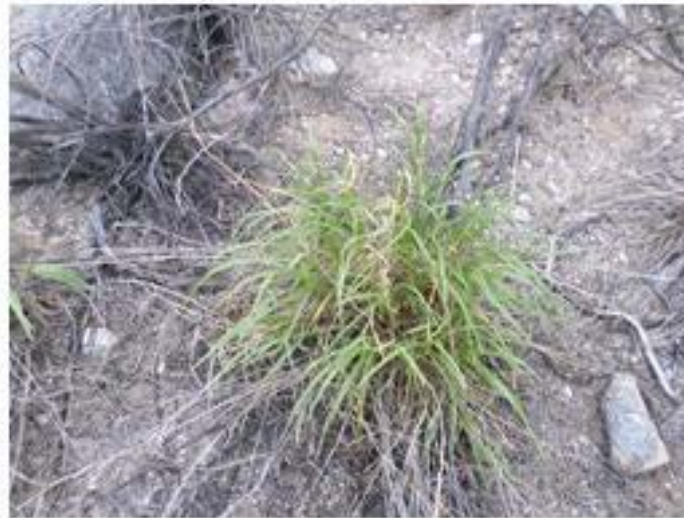

7-30-2014



# Watching Grass Grow

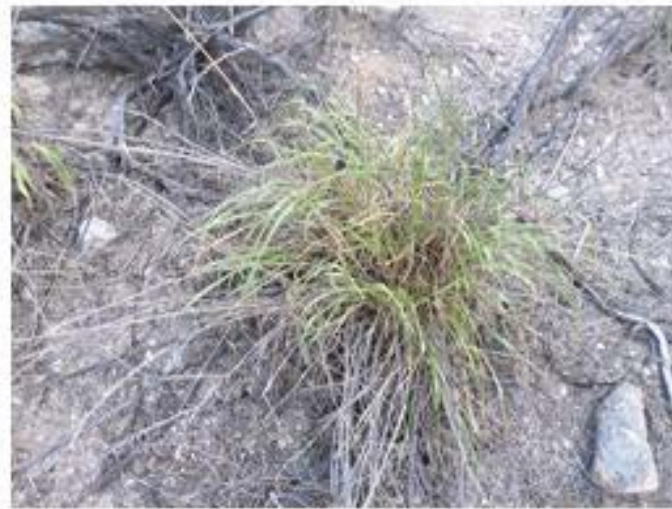

8-09-2014





# Watching Grass Grow

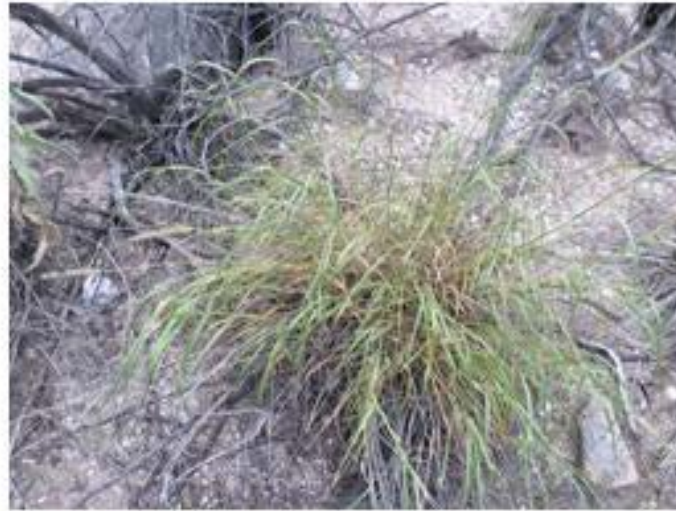

9-04-2014



# Watching Grass Grow

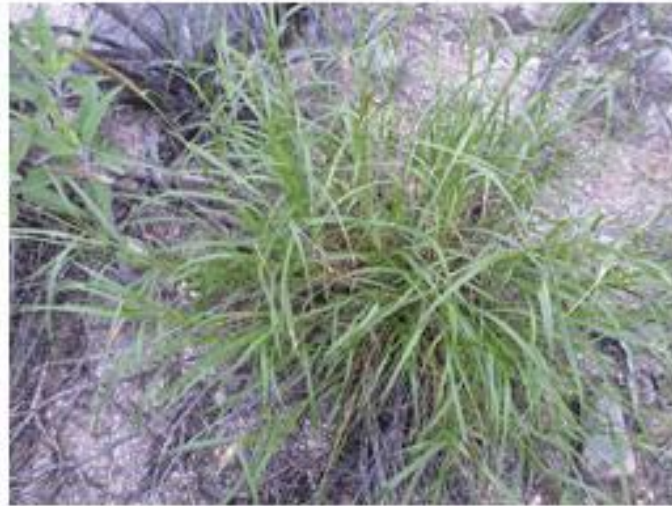

9-12-2014



# Watching Grass Grow

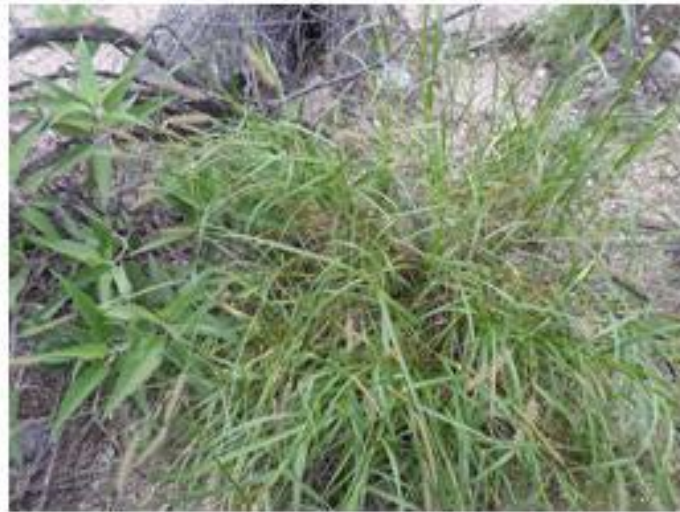

9-26-2014



# Watching Grass Grow

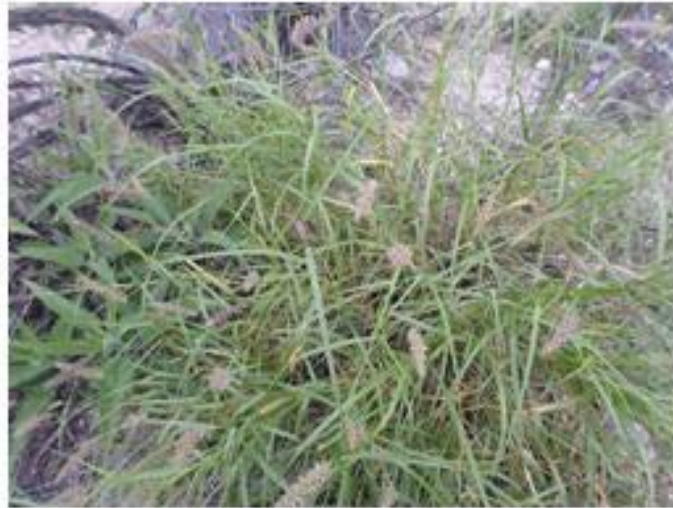

10-02-2014



Supplement: s1 [file s1]
